# Supplementary material for: Shape and structure controlling of calcium oxalate crystals by a combination of additives in the process of biomineralization
Source: Royal Society of Chemistry journal article supplement (doi:10.1039/c8ra00661j), 2018-01-01
Supplement: c8ra00661j1.pdf [file c8ra00661j1.pdf]

## Supporting Information

### Shape and structure controlling of calcium oxalate crystals by combinations of additives

Nian Liu<sup>ab</sup>, Hao Xie<sup>\*ab</sup>, Hang Ping<sup>b</sup>, Lin Wang<sup>a</sup>, Zewen Liu<sup>ab</sup>, Fei Tao<sup>ab</sup>, Junhui Guo<sup>a</sup>, Bao-Lian Su<sup>\*bc</sup>

a. School of Chemistry, Chemical Engineering and Life Sciences, Wuhan University of Technology, Wuhan, 430070, China. E-mail: [h.xie@whut.edu.cn](mailto:h.xie@whut.edu.cn) (H. Xie)

b. Laboratory of Living Materials at the State Key Laboratory of Advanced Technology for Materials Synthesis and Processing, Wuhan University of Technology, Wuhan, 430070, China. E-mail: [bao-lian.su@unamur.be](mailto:bao-lian.su@unamur.be) (B.-L. Su)

c. Laboratory of Inorganic Materials Chemistry, University of Namur, B-5000 Namur, Belgium

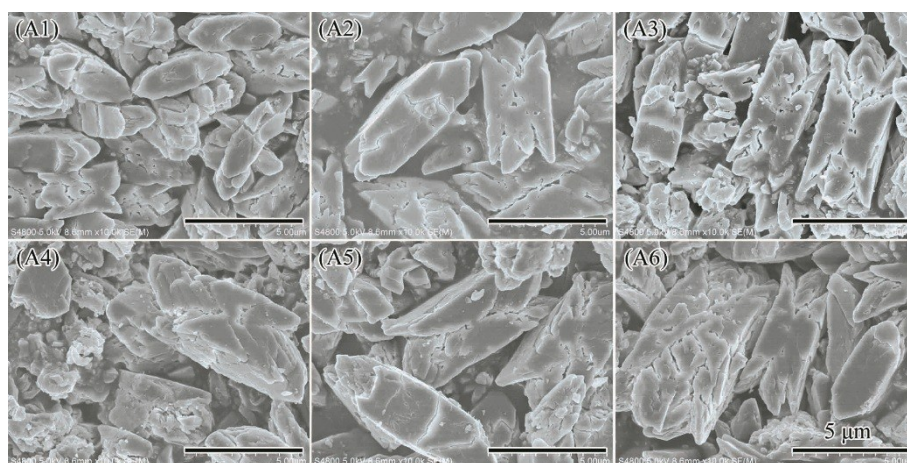

Figure S1. SEM image to show effects of D-aspartic acid on CaOx formation at pH 7. Panels (A1), (A2), (A3), (A4), (A5), (A6) show addition of D-aspartic acid at 0.1, 0.2, 0.4, 0.8, 1, 2 mmol/L.

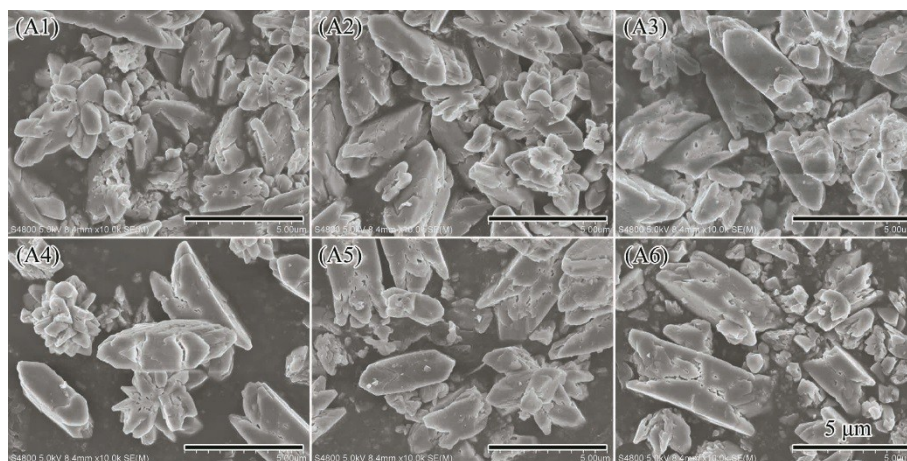

Figure S2. SEM image to show effects of L-aspartic acid on CaOx formation at pH 7. Panels (A1), (A2), (A3), (A4), (A5), (A6) show addition of L-aspartic acid at 0.1, 0.2, 0.4, 0.8, 1, 2 mmol/L.

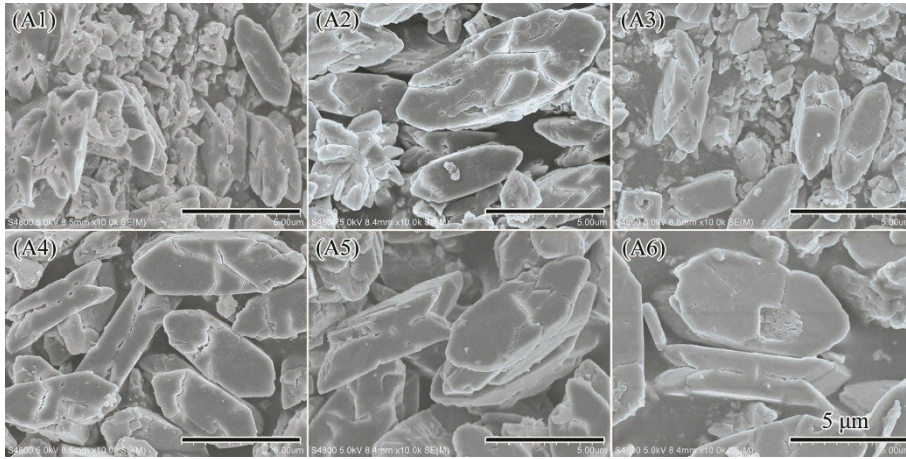

Figure S3. SEM image to show effects of  $Mg^{2+}$  on CaOx formation at pH 7. Panels (A1), (A2), (A3), (A4), (A5), (A6) show addition of  $Mg^{2+}$  at 0.1, 0.2, 0.4, 0.8, 1, 2 mmol/L.

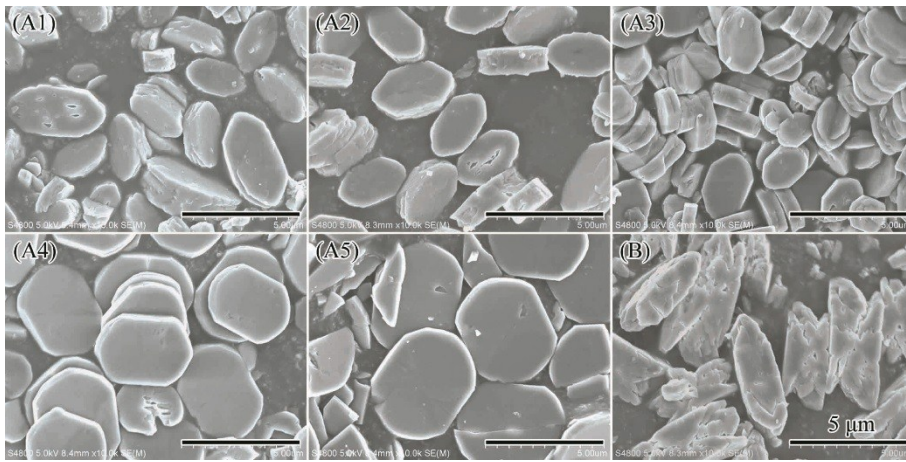

Figure S4. SEM image to show effects of  $Na_3Citrate$  on CaOx formation at pH 7. Panels (A1), (A2), (A3), (A4), (A5) show addition of  $Na_3Citrate$  at 0.1, 0.2, 0.4, 0.8, 1 mmol/L. Panel (B) shows CaOx formation of in the absence of additives.

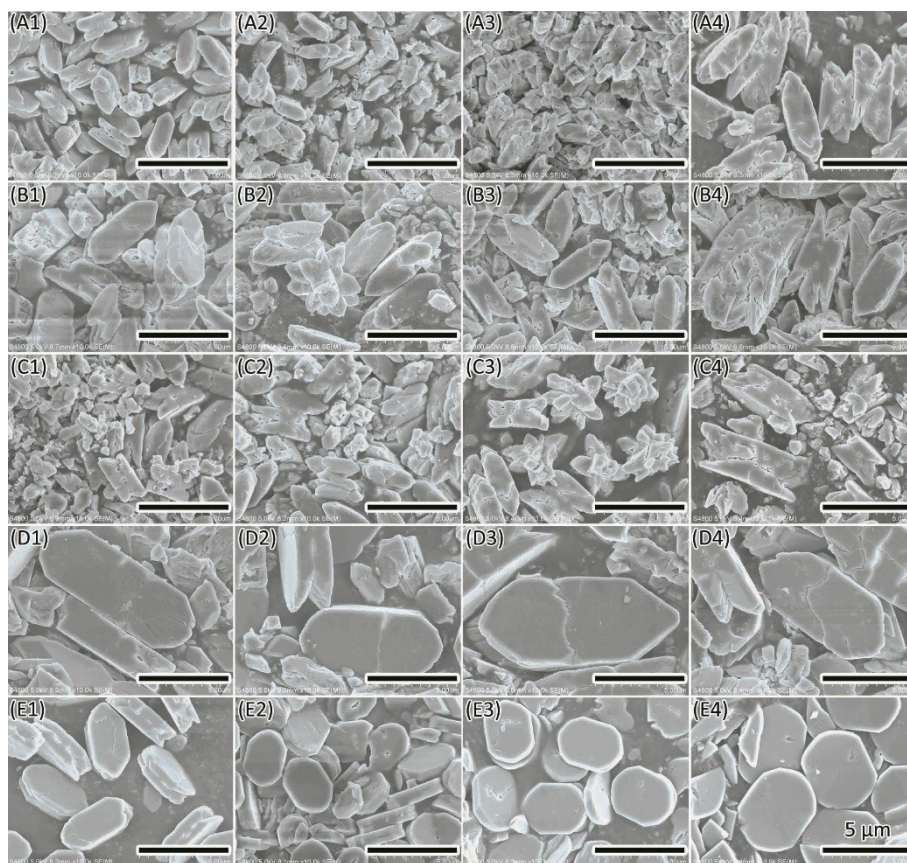

Figure S5. SEM images of COM formed at different pH. Panels (A1), (A2), (A3), (A4), CaOx. Panels (B1), (B2), (B3), (B4), CaOx with addition of D-aspartic acid (2 mmol/L). Panels (C1), (C2), (C3), (C4), CaOx with addition of L-aspartic acid (2 mmol/L). Panels (D1), (D2), (D3), (D4), CaOx with addition of  $Mg^{2+}$  (2 mmol/L). Panels (E1), (E2), (E3), (E4), CaOx with addition of  $Na_3$ Citrate (1 mmol/L). Numbers 1, 2, 3, 4 refer to pH 4, pH 5, pH 6, and pH 7, respectively.

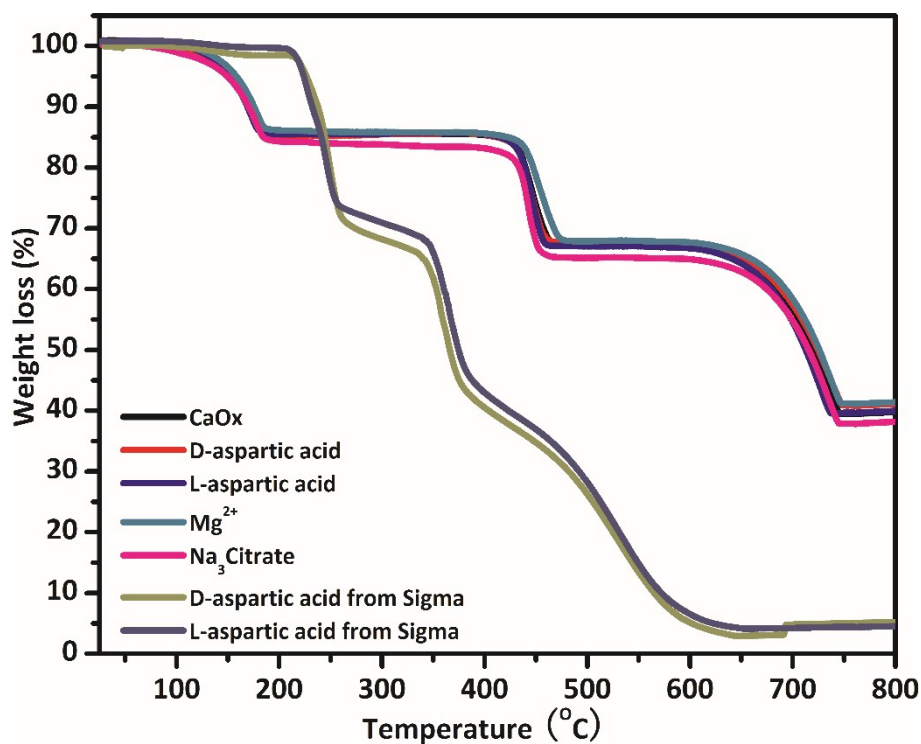

Figure S6. Thermogravimetric analysis of CaOx formed in the presence or absence of additives. Commercial chiral aspartic acid from Sigma Aldrich was also tested to show that no detectable amount of aspartic acid was included in COM crystals.

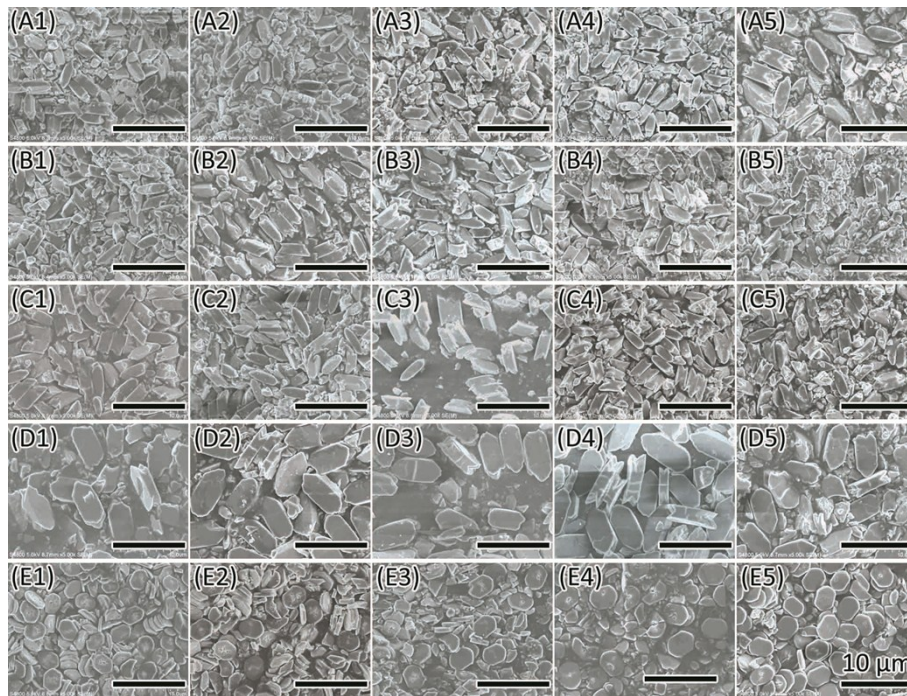

Figure S7. SEM images of COM formation in the presence or absence of additives. Panels (A1), (A2), (A3), (A4), CaOx. Panels (B1), (B2), (B3), (B4), CaOx with addition of D-aspartic acid (2 mmol/L). Panels (C1), (C2), (C3), (C4), CaOx with addition of L-aspartic acid (2 mmol/L). Panels (D1), (D2), (D3), (D4), CaOx with addition of  $Mg^{2+}$  (2 mmol/L). Panels (E1), (E2), (E3), (E4), CaOx with addition of  $Na_3Citrate$  (1 mmol/L). Numbers 1, 2, 3, 4, 5 refer to 0.25 hour, 0.5 hour, 1 hour, 2 hours, 4 hours, respectively.

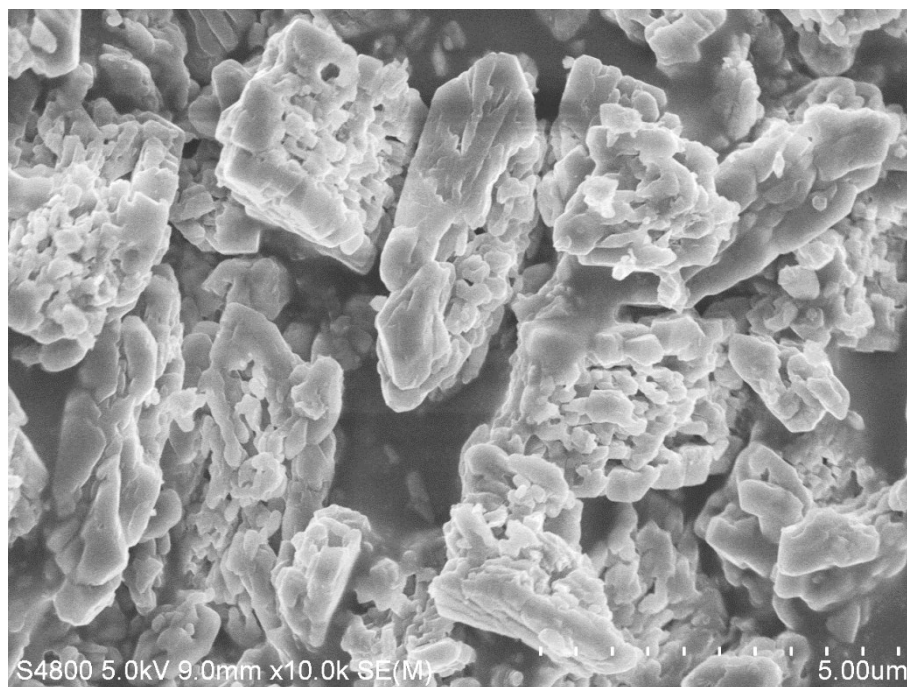

Figure S8. SEM image of CaOx formed in the presence of 2 mmol/L L-aspartic acid and crystallization time elongated to 10 days.

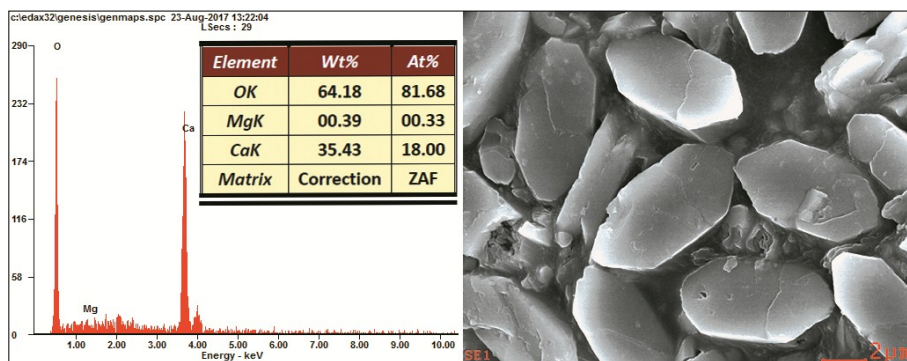

Figure S9. Energy dispersive spectra (left) and SEM image (right) of CaOx formed in the presence of 2 mmol/L  $Mg^{2+}$  in solution at pH 7.

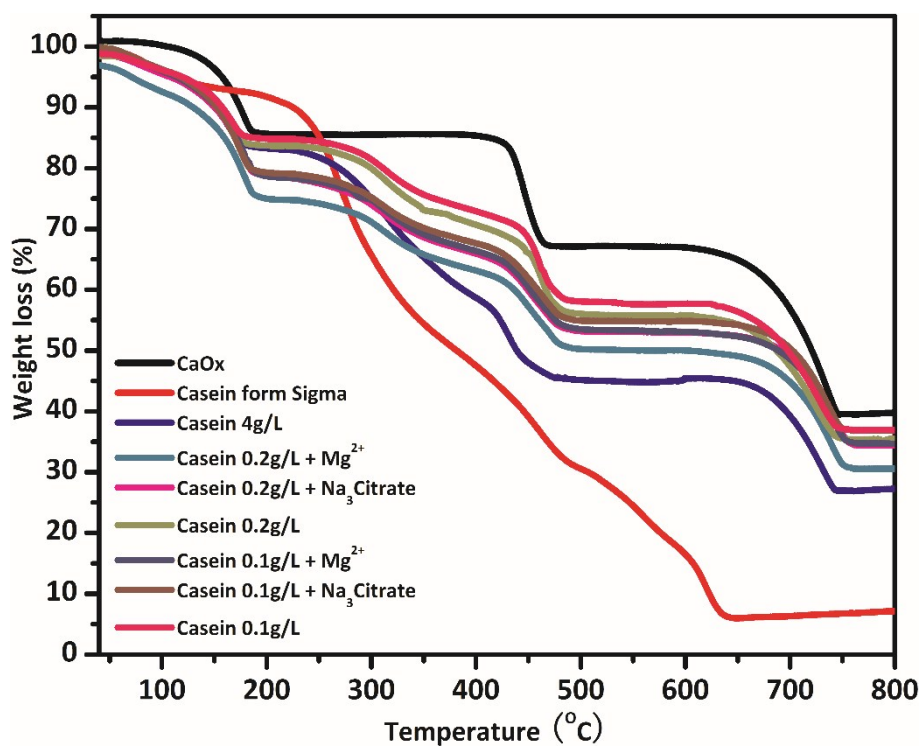

Figure S10. Thermogravimetric analysis of CaOx in the present of casein.

Table S1. Weight loss (%) of CaOx formed in the presence or absence of additives.

| Sample                                                 | 40-250 °C | 250-550 °C | 550-800 °C | Total |
|--------------------------------------------------------|-----------|------------|------------|-------|
| CaOx only                                              | 14.5      | 18.4       | 27.3       | 60.2  |
| D-aspartic acid from Sigma                             | 20.5      | 66.1       | 8.2        | 94.8  |
| L-aspartic acid from Sigma                             | 22.5      | 62.7       | 10.3       | 95.5  |
| CaOx formed in the presence of D-aspartic acid         | 14.7      | 17.5       | 26.7       | 58.9  |
| CaOx formed in the presence of L-aspartic acid         | 14.5      | 18.4       | 27.1       | 60.0  |
| CaOx formed in the presence of Mg <sup>2+</sup>        | 14.1      | 18.0       | 26.5       | 58.6  |
| CaOx formed in the presence of Na <sub>3</sub> Citrate | 16.0      | 18.9       | 26.9       | 61.8  |

Table S2. Weight loss (%) of CaOx in the presence of casein.

| Sample                                        | 40-250 °C | 250-550 °C | 550-800 °C | Total |
|-----------------------------------------------|-----------|------------|------------|-------|
| CaOx only                                     | 14.5      | 18.4       | 27.3       | 60.2  |
| Casein from Sigma                             | 14.7      | 60.8       | 17.3       | 92.8  |
| CaOx formed in the presence of 4 g/L Casein   | 18.2      | 36.9       | 17.6       | 72.7  |
| CaOx formed in the presence of 2 g/L Casein   | 20.0      | 32.5       | 17.9       | 70.4  |
| CaOx formed in the presence of 0.8 g/L Casein | 17.3      | 33.3       | 17.2       | 67.8  |
| CaOx formed in the presence of 0.2 g/L Casein | 16.7      | 27.5       | 20.3       | 64.5  |
| CaOx formed in the presence of 0.1 g/L Casein | 15.6      | 26.7       | 20.7       | 63.0  |

Table S3. Binding energy (eV) of CaOx formed in the presence or absence of additives.

| Sample                                                            | C 1s  | Ca 2p | N 1s  | O 1s  | Mg 1s  |
|-------------------------------------------------------------------|-------|-------|-------|-------|--------|
| CaOx only                                                         | 284.8 | 347.3 | 400.2 | 532.1 | 1308.2 |
| CaOx formed in the presence of Casein                             | 284.8 | 347.2 | 399.7 | 531.5 | 1299.7 |
| CaOx formed in the presence of Casein and Mg <sup>2+</sup>        | 284.8 | 347.4 | 399.8 | 531.8 | 1301.9 |
| CaOx formed in the presence of Casein and Na <sub>3</sub> Citrate | 284.8 | 347.5 | 399.8 | 531.8 | 1309.2 |
